# Supplementary material
Source: publisher figshare collection journal article supplement (https://sage.figshare.com/ndownloader/files/26578326)
Supplement: Supplementary file 3 [file 26578326]

Archive with 3 entries (3 files):
- Osei_coi_disclosure.pdf
- Wolff_coi_disclosure.pdf
- Nguyen_coi_disclosure.pdf
